# Supplementary material for: The Cuprizone Mouse Model: A Comparative Study of Cuprizone Formulations from Different Manufacturers
Source: Int J Mol Sci. 2023 Jun 23;24(13):10564. doi: 10.3390/ijms241310564 (PMC10341492; doi:10.3390/ijms241310564)
Supplement: Supplementary file 1 [file ijms-24-10564-s001.zip]

Archive with 4 entries (4 files):
- Supplementary material/Figure S1.pdf
- Supplementary material/Figure S2.tif
- Supplementary material/Figure S3.tif
- Supplementary material/Figure S4.tif
