# Supplementary figures and images for: The Cuprizone Mouse Model: A Comparative Study of Cuprizone Formulations from Different Manufacturers
Source: MDPI journal article supplement (doi:10.3390/ijms241310564), 2023-06-23

## Cuprizone A

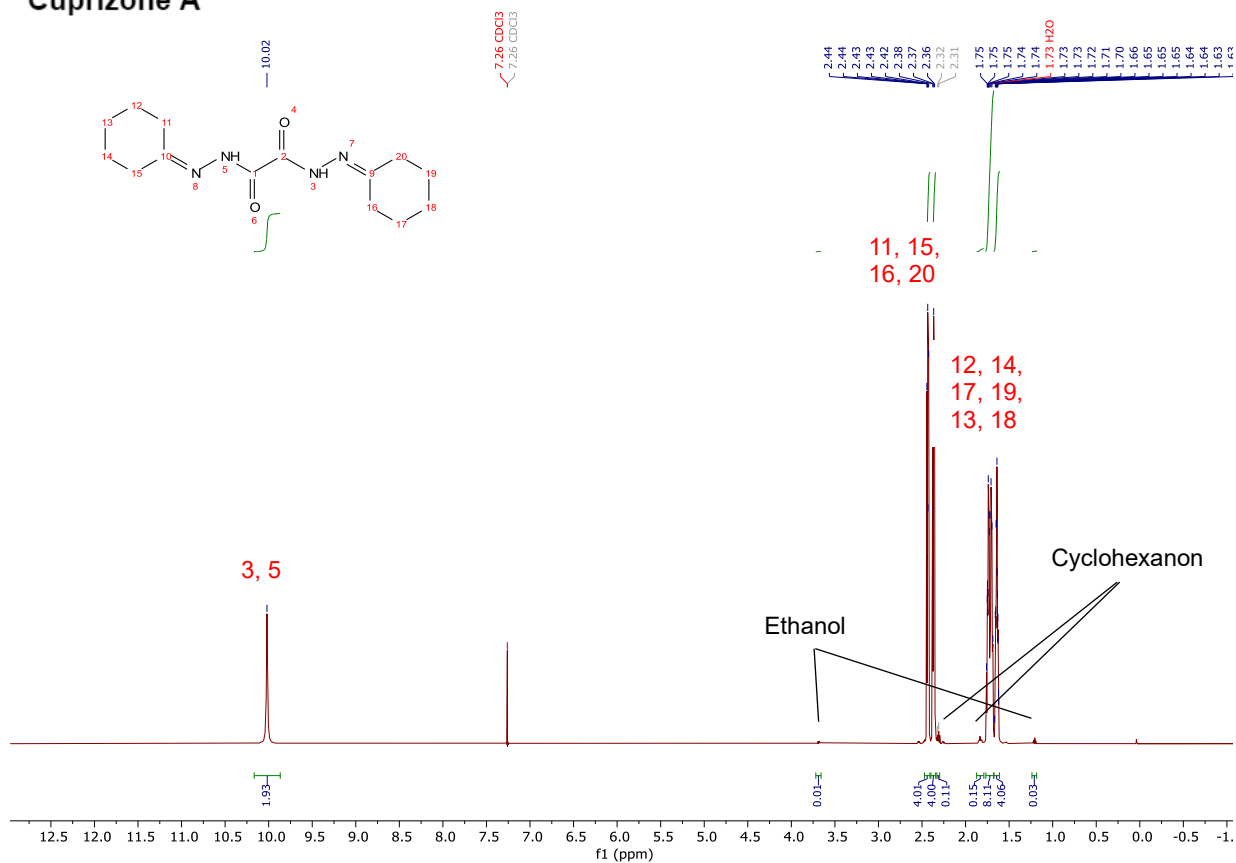

## Cuprizone B

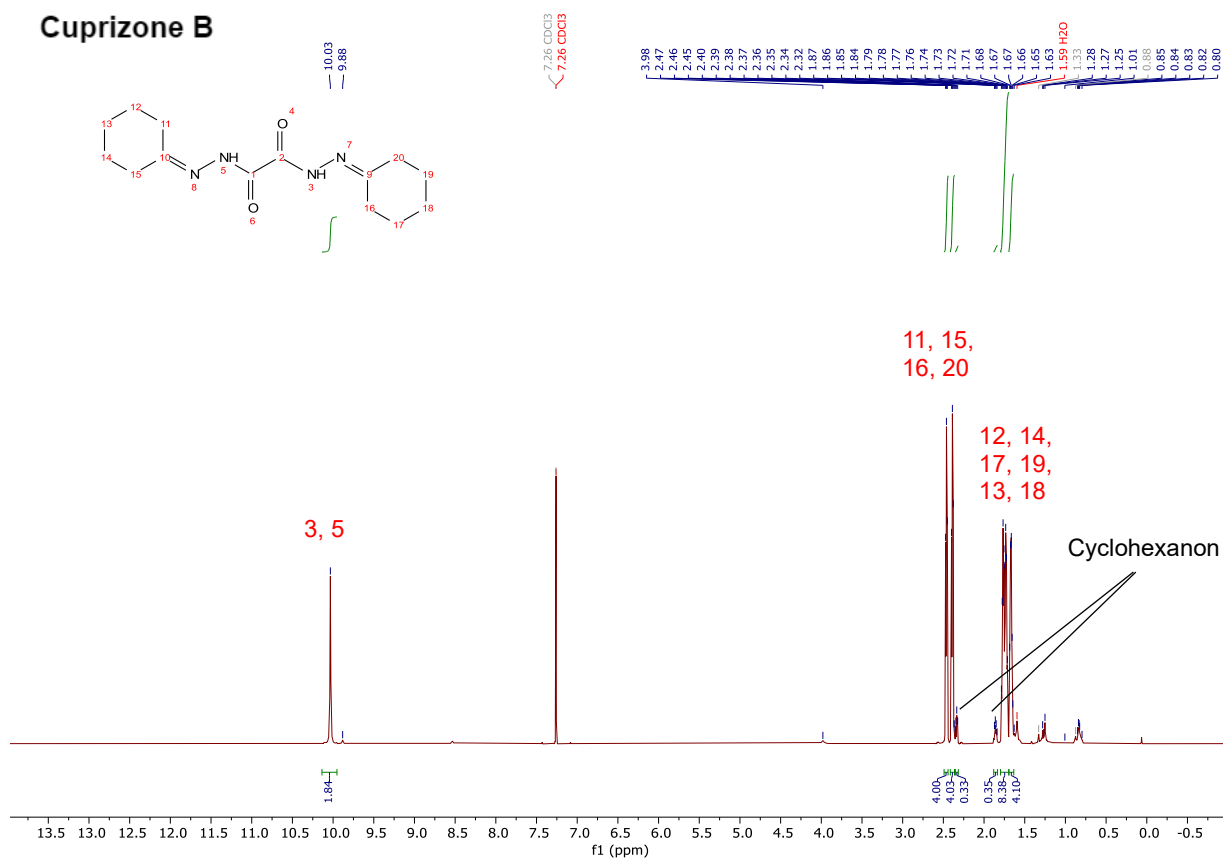

## Cuprizone C

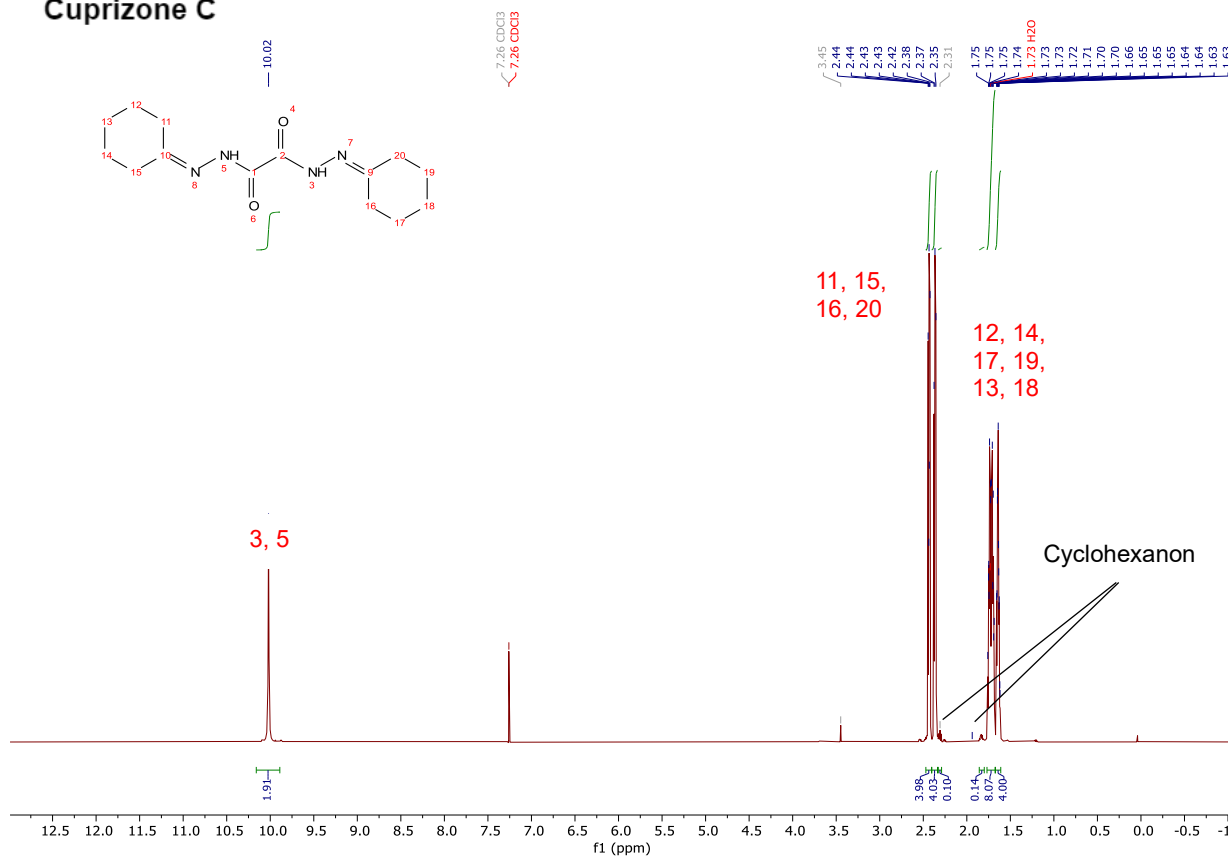

## Cuprizone D

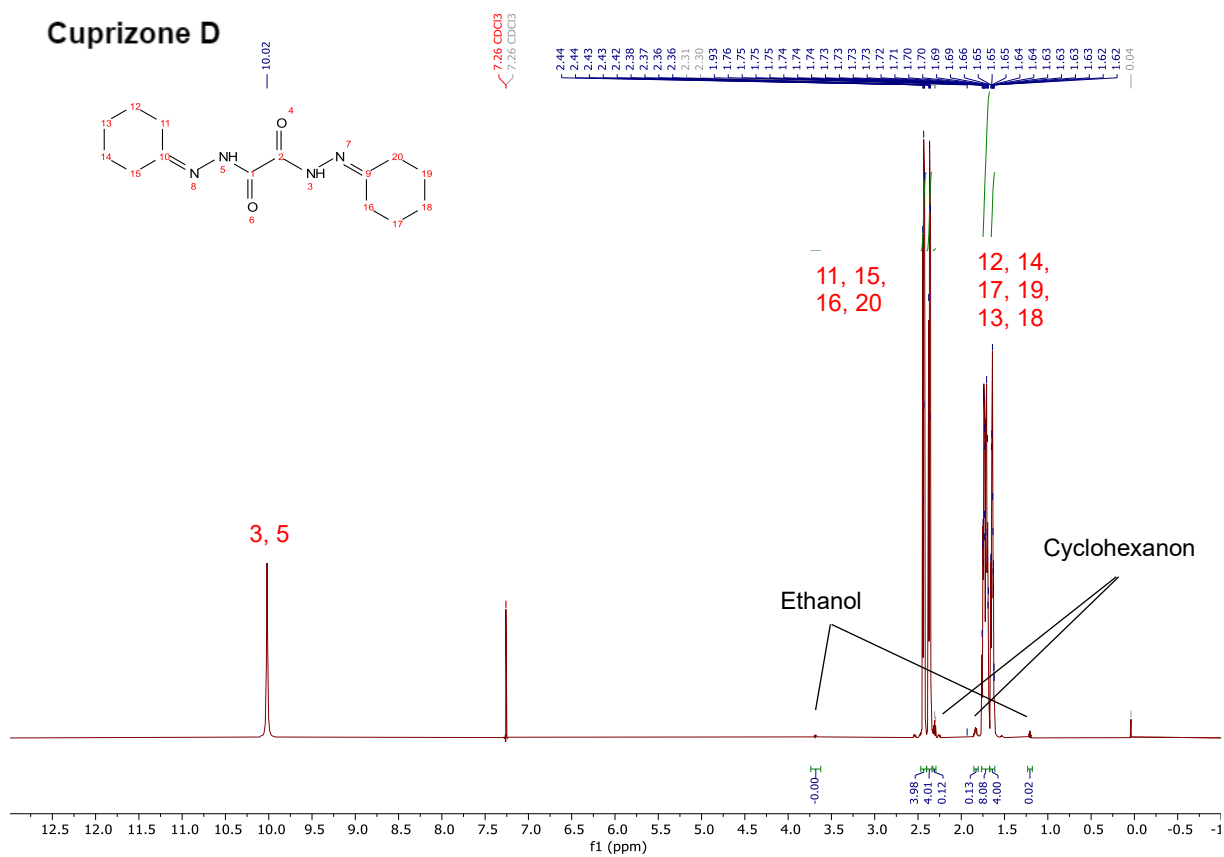

## Cuprizone E

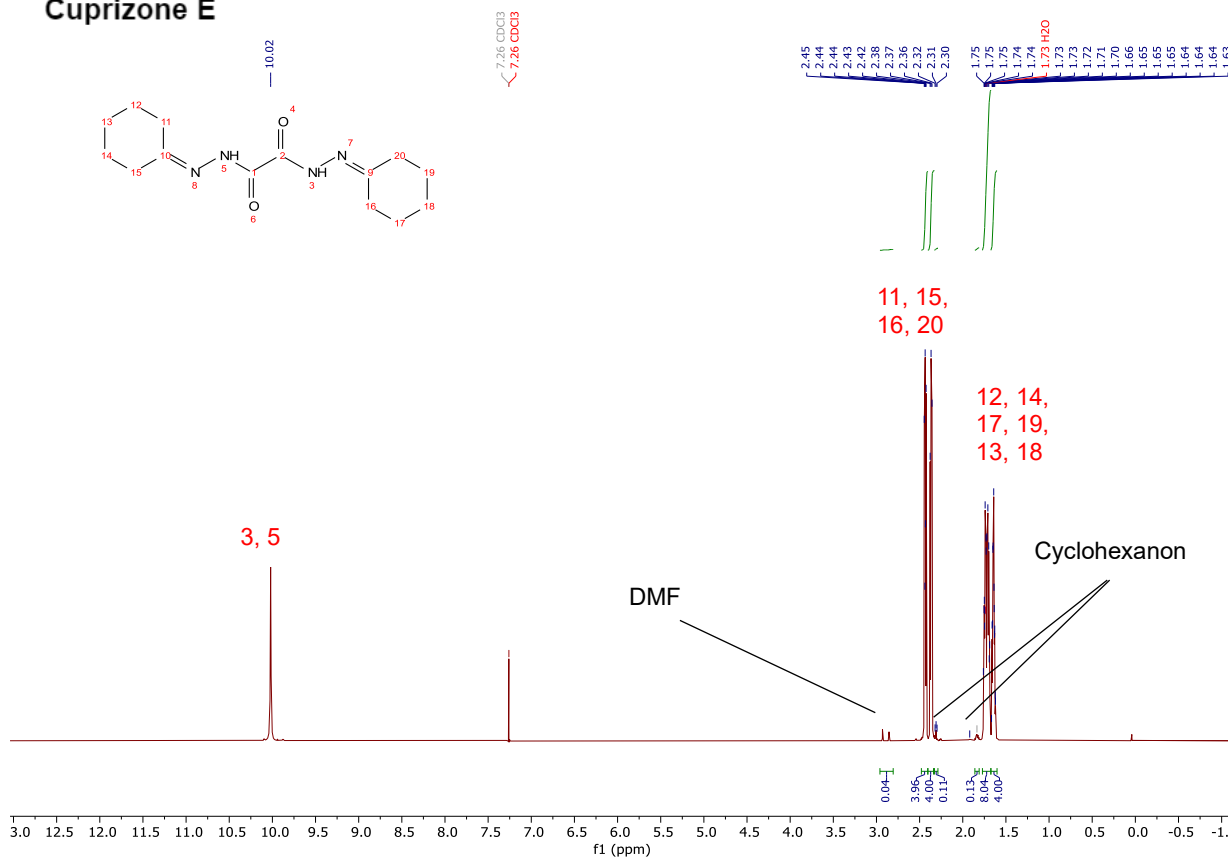

## Cuprizone F

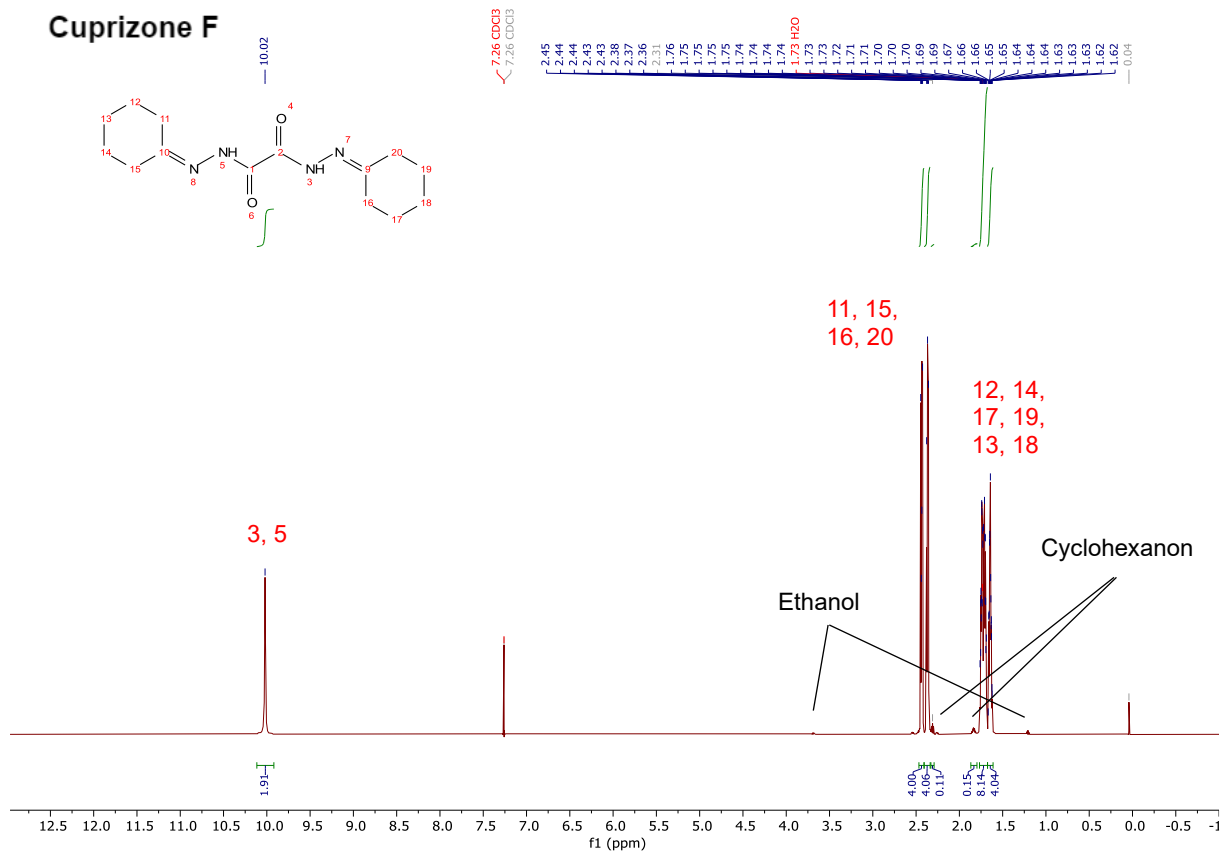

Supplement: s1 [file s1]
